# Supplementary material
Source: PubMed Central journal article supplement (PMC2278123)

# Supplement Fig. 1

**A**

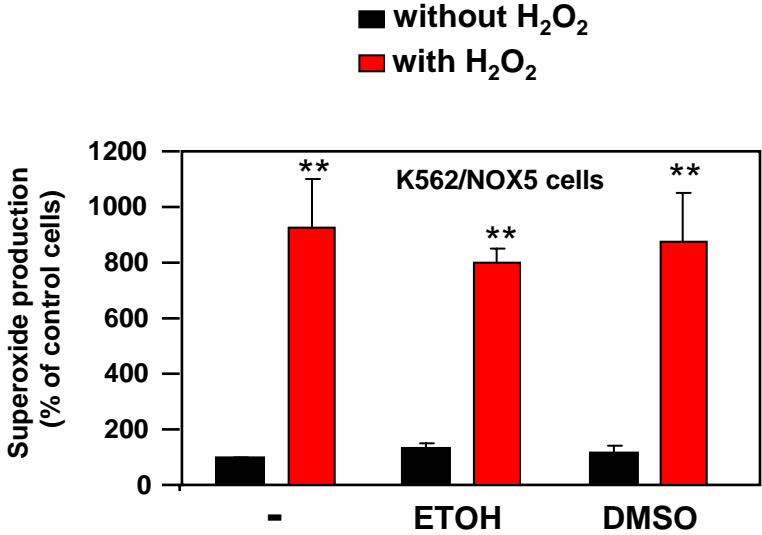

**B**

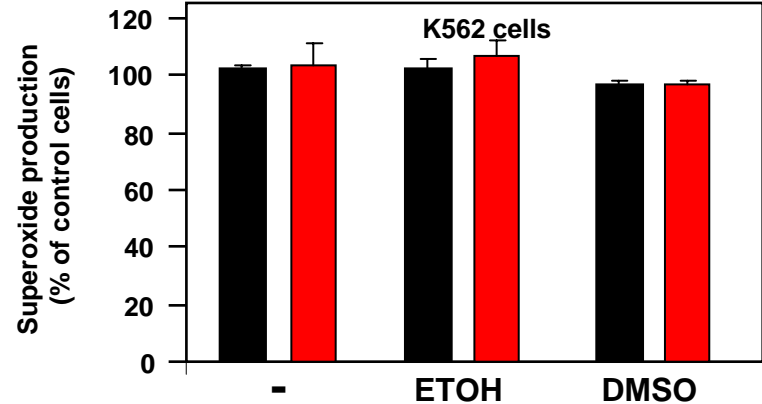

Supplement Fig. 2

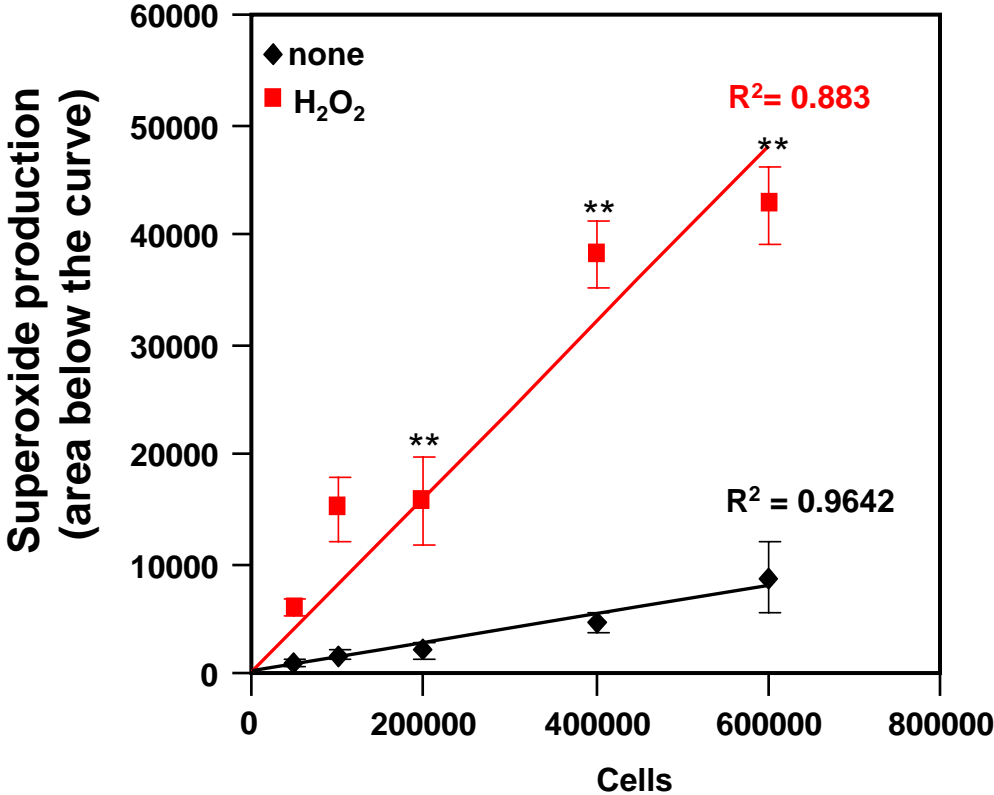

# Supplement Fig. 3

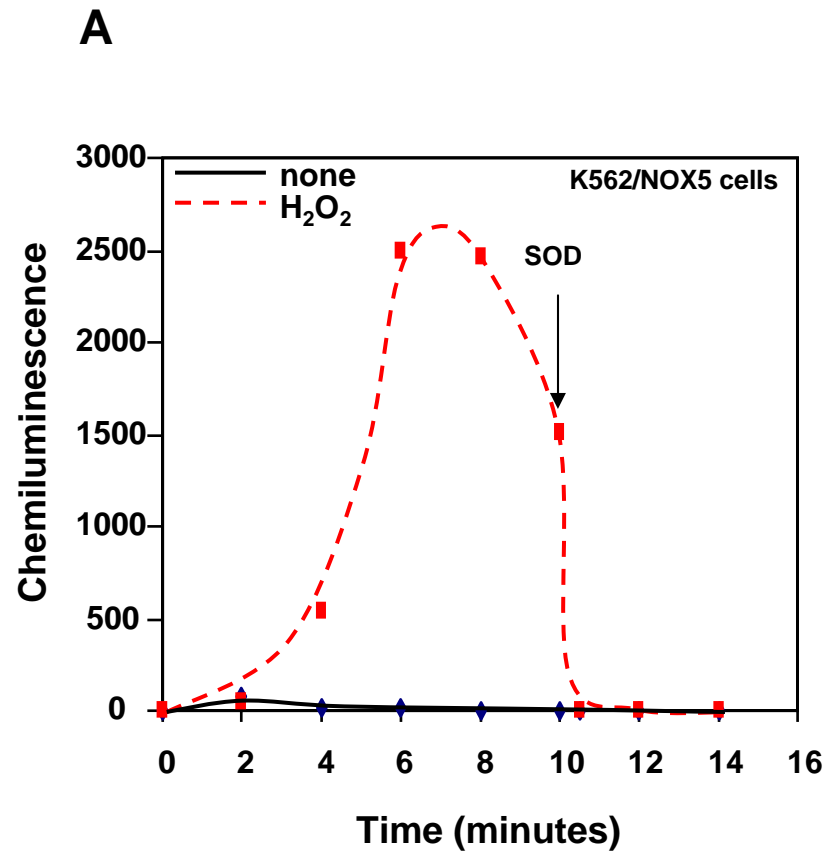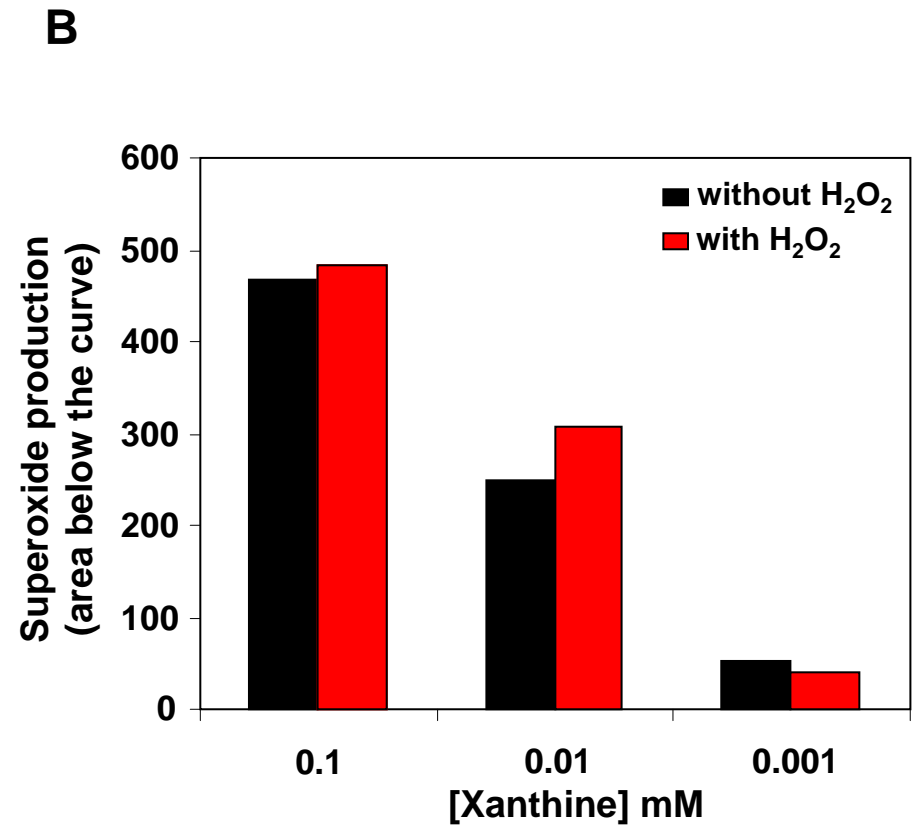

# Supplement Fig. 4

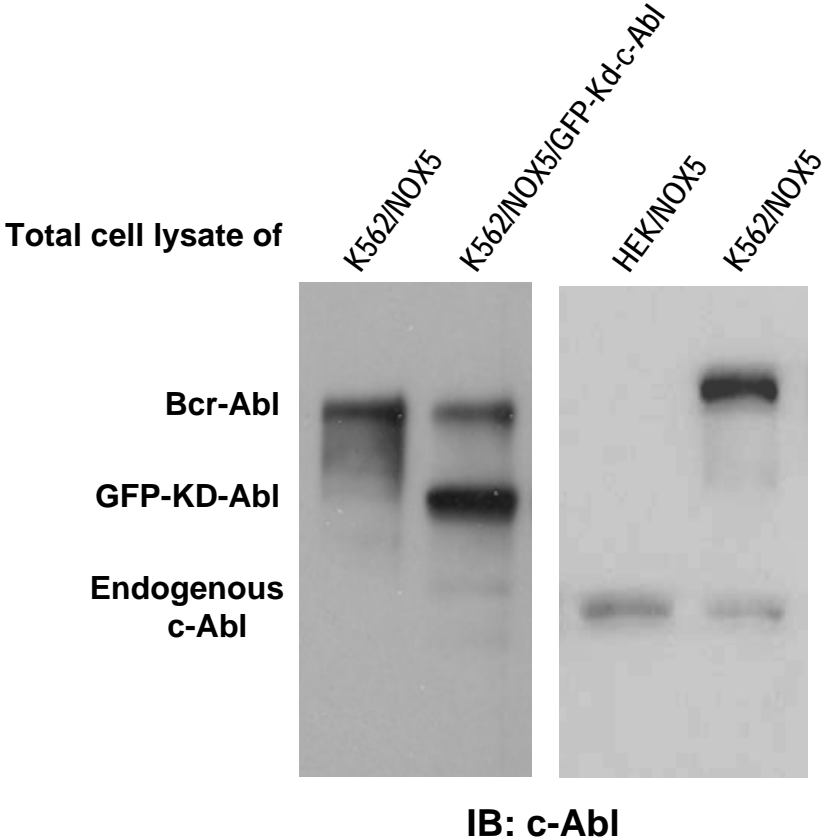

# Supplement Fig. 5

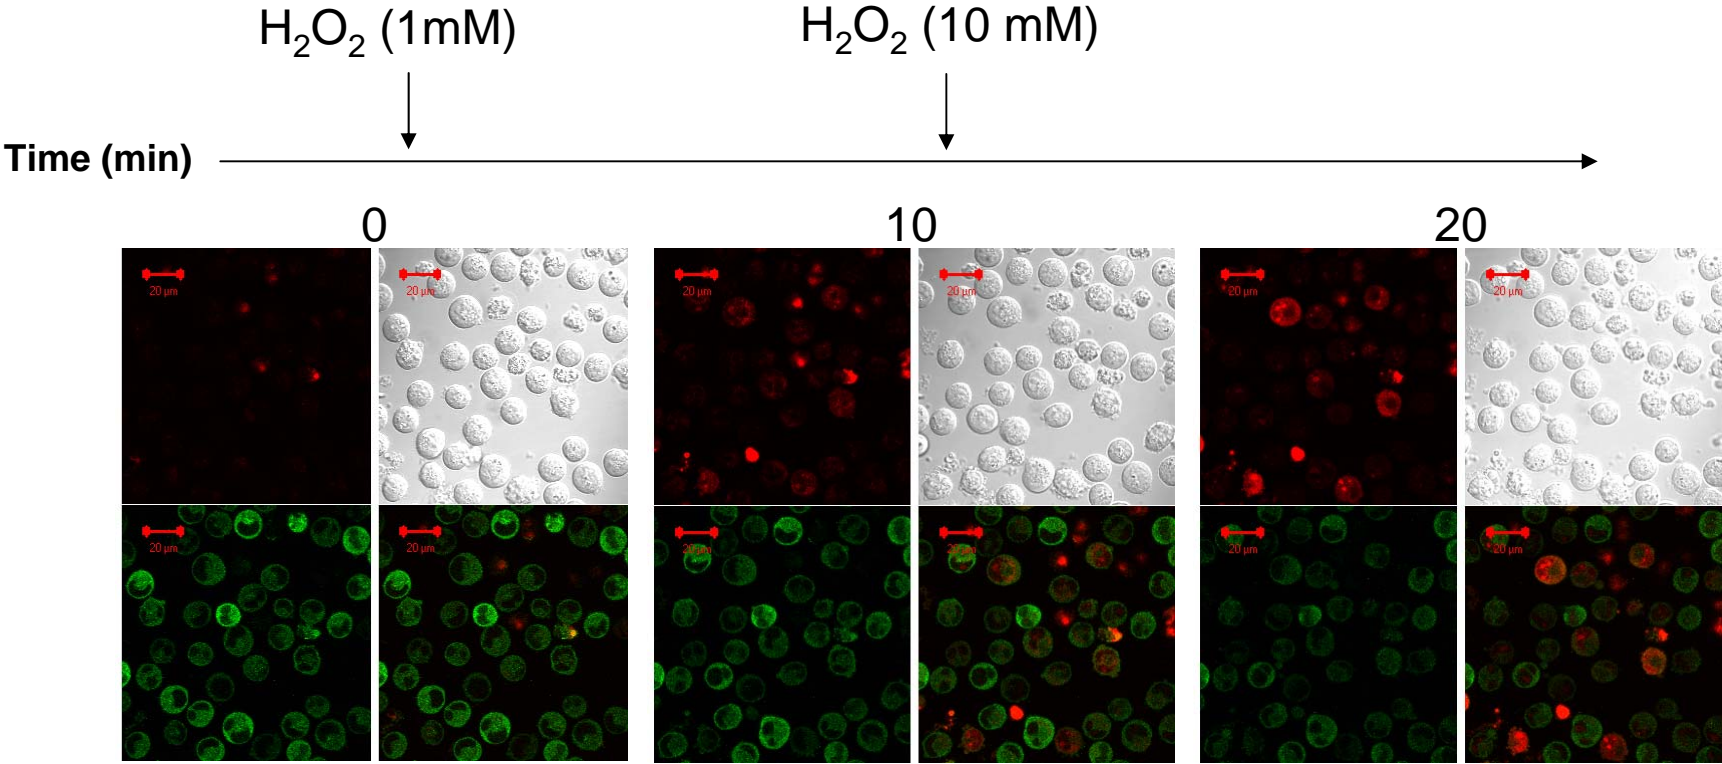

# Supplement Fig. 6

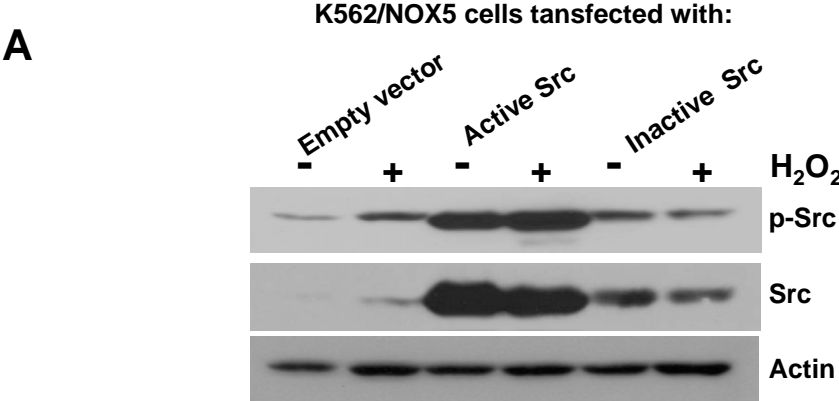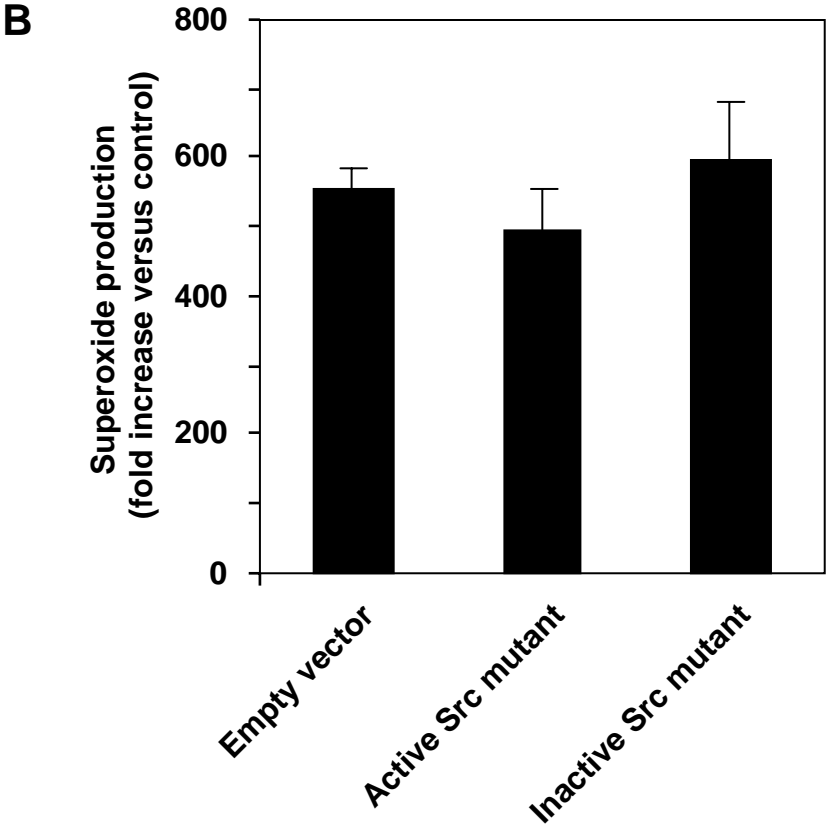

# Supplement Fig. 7

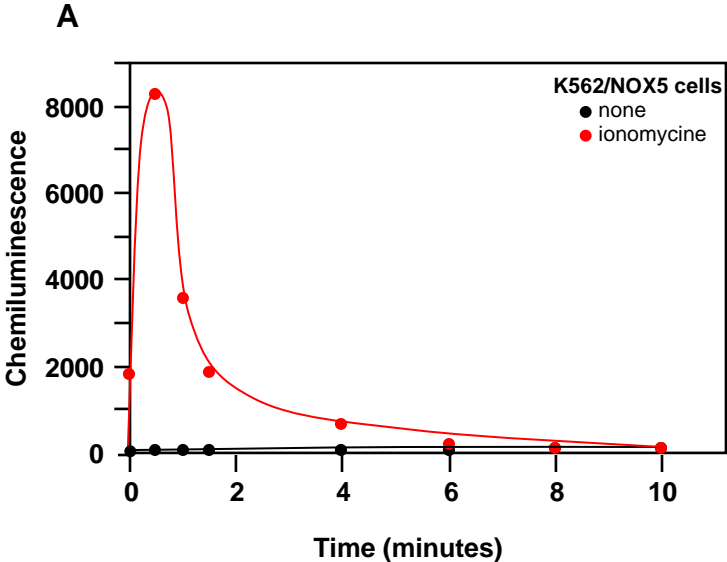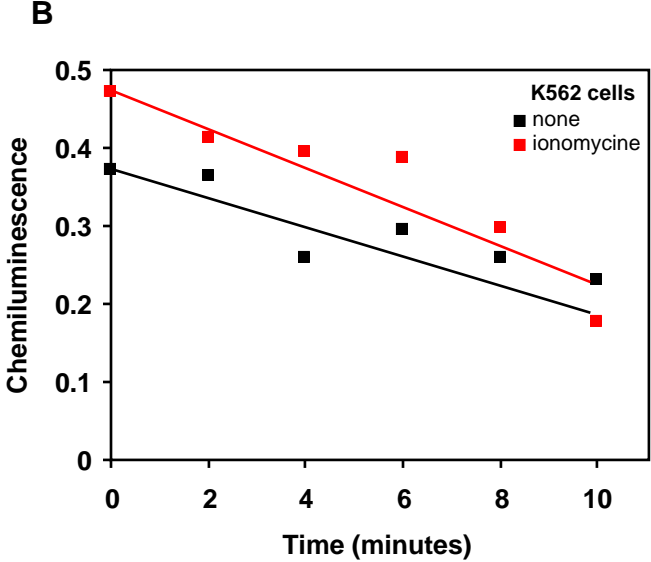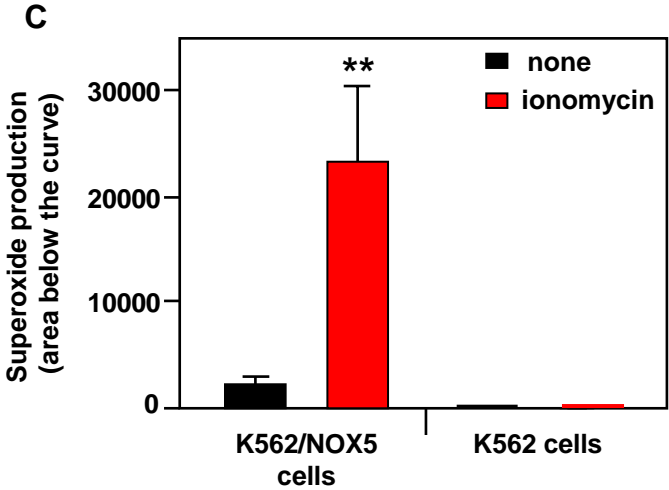

Supplement: NIHMS41485-supplement-01.pdf [file NIHMS41485-supplement-01.pdf]
